# Supplementary material
Source: PubMed Central journal article supplement (PMC2747516)
Supplement: NIHMS122817-supplement-2.pdf [file NIHMS122817-supplement-2.pdf]

## Supporting Information

### **A Bulky Rhodium Complex Bound to an Adenosine-Adenosine DNA Mismatch: General Architecture of the Metalloinsertion Binding Mode<sup>†</sup>**

Brian M. Zeglis, Valérie C. Pierre,<sup>§</sup> Jens T. Kaiser, Jacqueline K. Barton\*  
Division of Chemistry and Chemical Engineering  
California Institute of Technology, Pasadena CA 91125

**Figure S1.** Crystal packing at the  $\text{Rh}(\text{bpy})_2(\text{chrysi})^{3+}$  intercalation site in structure **2**.

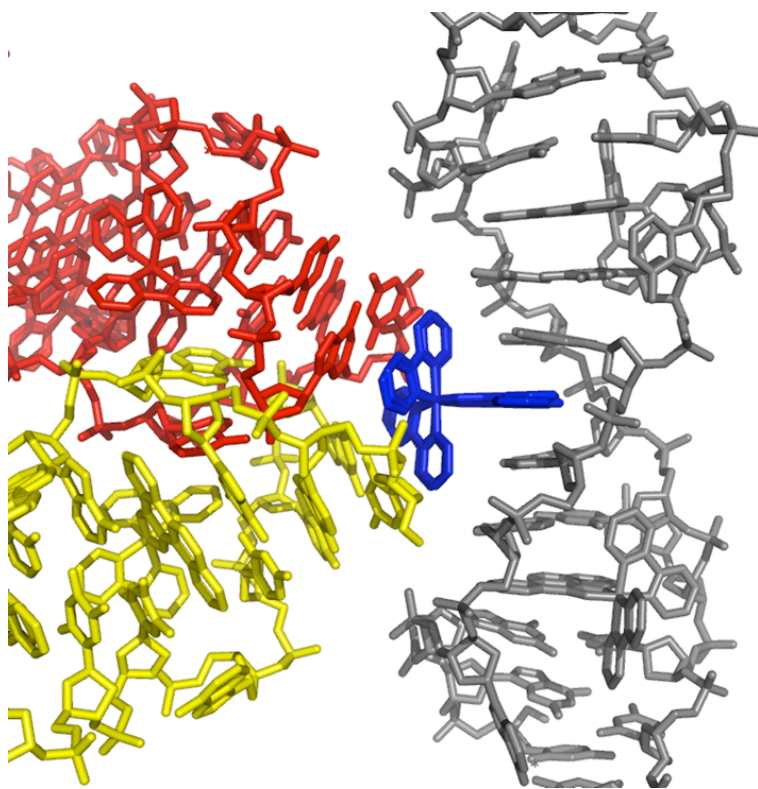

**Figure S2.** Superposition of entire duplex of structures **1** (green) and **2** (blue), illustrating the slight bending of the duplex in structure **1** relative to that in structure **2**.

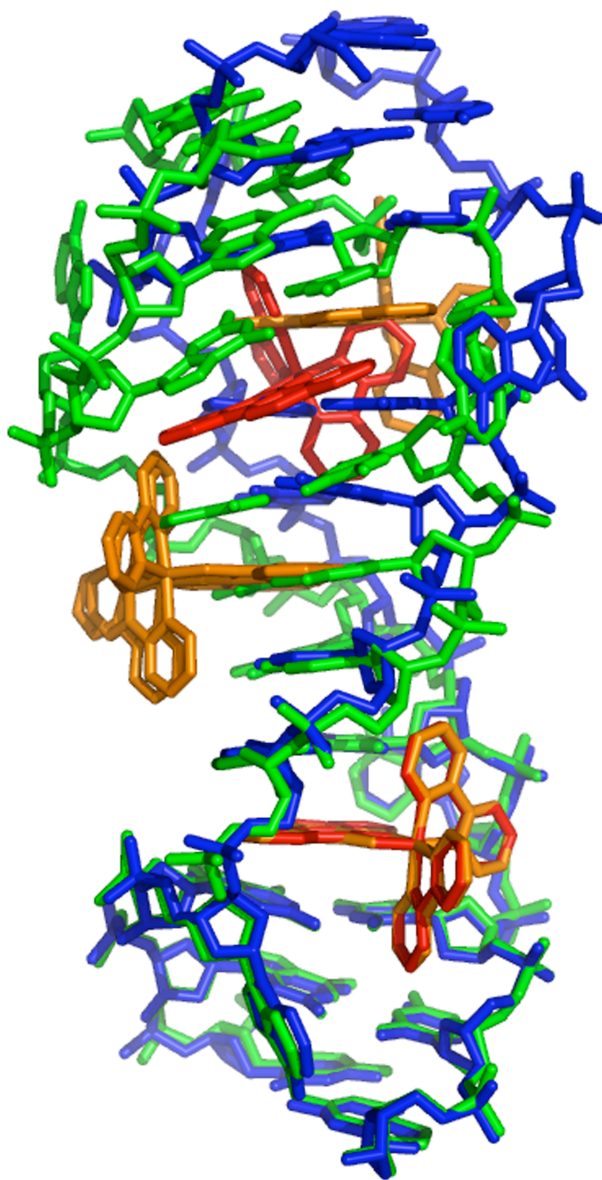

**Figure S3.** Interhelical stacking interactions for the ejected adenosines of a single duplex in structure **1**.

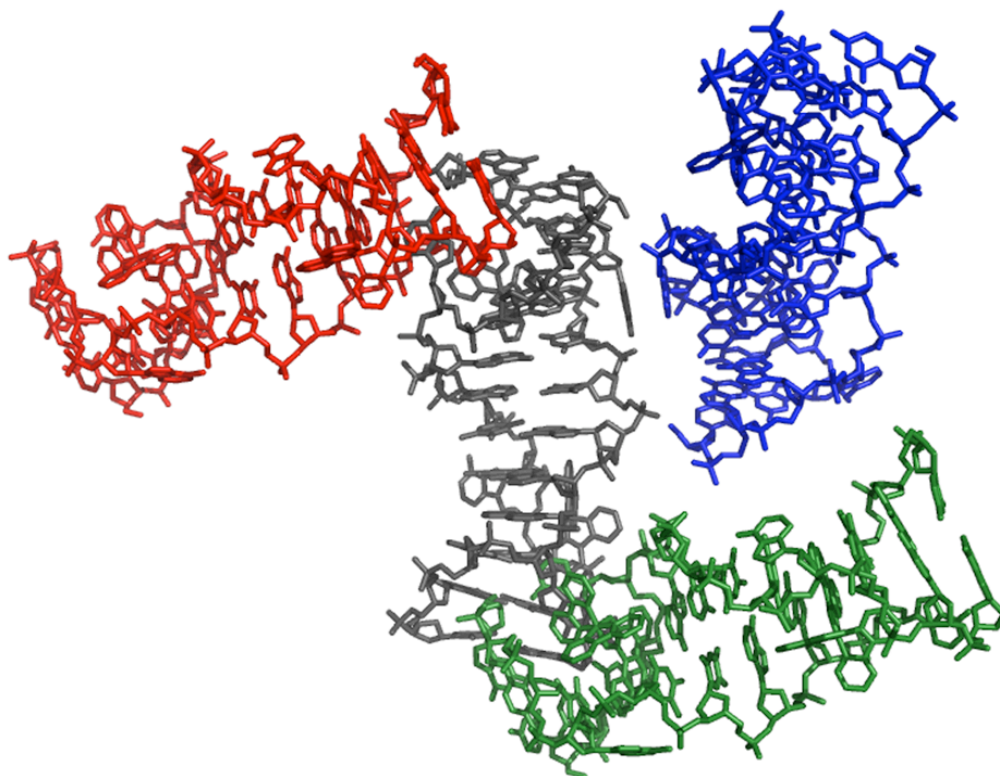

**Figure S4.** Interhelical stacking interactions for the ejected adenosines of a single duplex in structure 2.

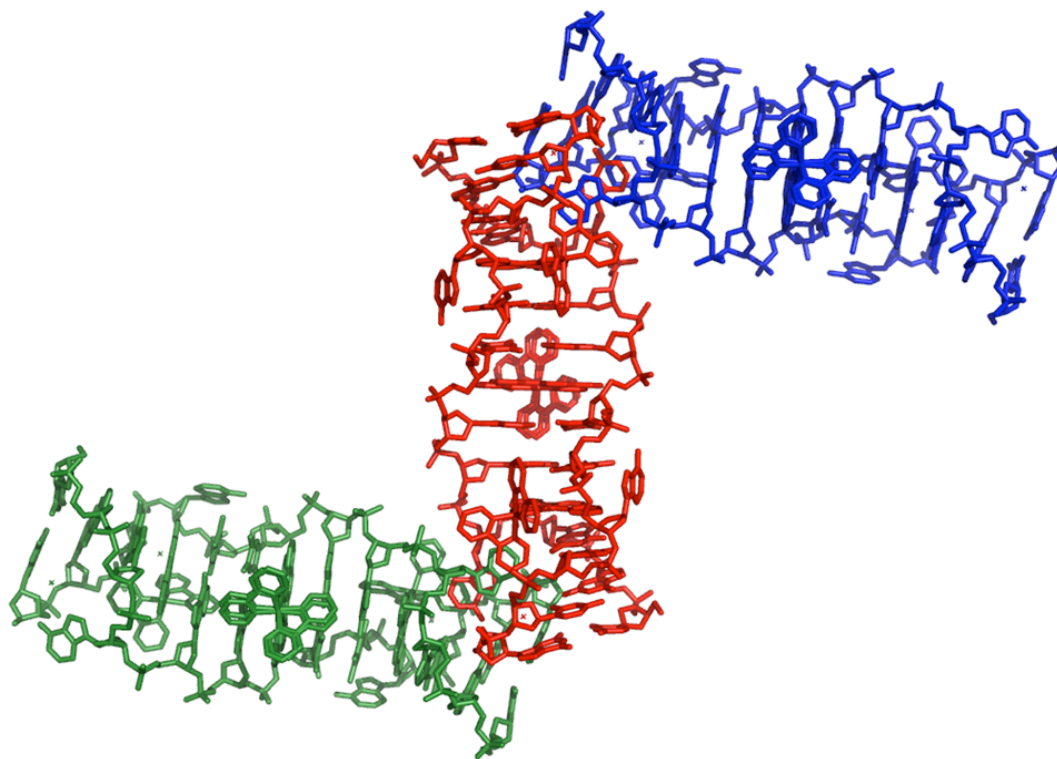

**Supplementary Table 1.** DNA helical parameters<sup>a</sup> relating consecutive base pairs of structure **2**.<sup>b</sup>

| <b>Base-pair</b> | <b>Shift (Å)</b> | <b>Slide (Å)</b> | <b>Rise (Å)</b> | <b>Tilt (°)</b> | <b>Roll (°)</b> | <b>Twist (°)</b> |
|------------------|------------------|------------------|-----------------|-----------------|-----------------|------------------|
| <b>CG/CG</b>     | 1.1              | 2.2              | 3.0             | 11.0            | 2.8             | 40.0             |
| <b>GG/CC</b>     | -0.4             | 2.7              | 3.3             | -6.0            | 6.1             | 34.8             |
| <b>GA/TC</b>     | -                | -                | -               | -               | -               | -                |
| <b>AA/TT</b>     | -0.8             | 0.8              | 3.3             | 0.4             | 4.3             | 32.2             |
| <b>AT/AT</b>     | 0.0              | -0.2             | 7.1             | 0.0             | -10.4           | 27.3             |
| <b>TT/AA</b>     | 0.8              | 0.8              | 3.3             | 0.4             | 4.3             | 32.2             |
| <b>TC/GA</b>     | -                | -                | -               | -               | -               | -                |
| <b>CC/GG</b>     | 0.4              | 2.7              | 3.3             | 6.0             | 6.1             | 34.8             |
| <b>CG/CG</b>     | -1.1             | 2.2              | 3.0             | -11.0           | 2.8             | 40.0             |
| <b>B-DNA</b>     | -0.1             | -0.8             | 3.3             | -1.3            | -3.6            | 36               |

<sup>a</sup> Geometrical relationships between consecutive base pairs: shift, translation into the groove; slide, translation toward the phosphodiester backbone; rise, translation along the helix axis; tilt, rotation about the pseudo-twofold axis relating the DNA strands; roll, rotation about a vector between the C1' atoms; and twist, rotation about the helix axis.

<sup>b</sup> Data were calculated by using the program 3DNA.<sup>30</sup>

**Supplementary Table 2.** DNA helical parameters<sup>a</sup> of base pairs of structure 2.<sup>b</sup>

| <b>Base-pair</b>  | <b>Shear<br/>(Å)</b> | <b>Stretch<br/>(Å)</b> | <b>Stagger<br/>(Å)</b> | <b>Buckle<br/>(°)</b> | <b>Propeller<br/>(°)</b> | <b>Opening<br/>(°)</b> | <b>Sugar<br/>pucker</b> |
|-------------------|----------------------|------------------------|------------------------|-----------------------|--------------------------|------------------------|-------------------------|
| <b>C-G</b>        | 0.0                  | -0.3                   | 0.8                    | -16.2                 | -2.4                     | -4.9                   | C2'-endo                |
| <b>G-C</b>        | -0.2                 | -0.3                   | 0.0                    | 3.4                   | 1.4                      | -2.1                   | C2'-endo                |
| <b>G-C</b>        | -0.3                 | -0.1                   | 0.5                    | 18.0                  | -6.0                     | 0.2                    | C2'-endo                |
| <b><u>A-A</u></b> | -                    | -                      | -                      | -                     | -                        | -                      | C2'-endo                |
| <b>A-T</b>        | -0.1                 | -0.1                   | 0.1                    | -1.3                  | 8.6                      | 5.1                    | C2'-endo                |
| <b>A-T</b>        | 0.1                  | -0.2                   | 0.2                    | 7.3                   | -6.9                     | 1.2                    | C2'-endo                |
| <b>T-A</b>        | -0.1                 | -0.2                   | 0.2                    | -7.3                  | -6.9                     | 1.2                    | C2'-endo                |
| <b>T-A</b>        | 0.1                  | -0.1                   | 0.1                    | 1.3                   | 8.6                      | 5.1                    | C2'-endo                |
| <b><u>A-A</u></b> | -                    | -                      | -                      | -                     | -                        | -                      | C2'-endo                |
| <b>C-G</b>        | 0.3                  | -0.1                   | 0.5                    | -18.0                 | -6.0                     | 0.2                    | C2'-endo                |
| <b>C-G</b>        | 0.2                  | -0.3                   | 0.0                    | -3.4                  | 1.4                      | -2.1                   | C2'-endo                |
| <b>G-C</b>        | 0.0                  | -0.3                   | 0.8                    | 16.2                  | -2.4                     | -4.9                   | C2'-endo                |
| <b>B-DNA</b>      | 0                    | 0.1                    | 0.1                    | 0.1                   | 4.1                      | -4.1                   | C2'-endo                |

<sup>a</sup> Relationships between the bases that compose the pair, in directions that correspond with those of Table 2.

<sup>b</sup> Data were calculated by using the program 3DNA.<sup>30</sup>
